# Supplementary material for: Stress control and dislocation reduction in the initial growth of GaN on Si (111) substrates by using a thin GaN transition layer
Source: Royal Society of Chemistry journal article supplement (doi:10.1039/c9ce00744j), 2019-01-01
Supplement: c9ce00744j1.pdf [file c9ce00744j1.pdf]

### 1. Crystal quality and surface morphology of AlN nucleation layer on Si substrates

The crystal quality of AlN nucleation layer on Si substrates was characterized by HRXRD measurements. As shown in Fig.S1, the full width of half maximums (FWHMs) of (002) and (102) X-ray rocking curves are 1308 and 2427 arcsec, respectively. The surface morphology of AlN nucleation layer was characterized by atomic force microscope (AFM). The typical root-mean-square (RMS) roughness value over  $10 \times 10 \mu\text{m}^2$  is 0.247nm.

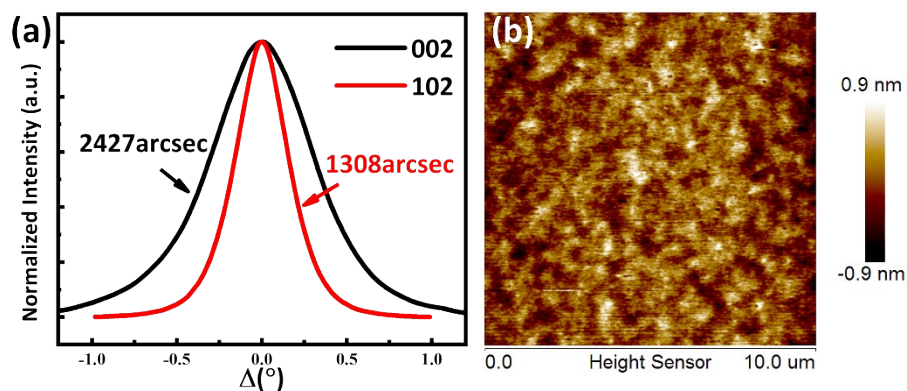

Fig.S1 (a) Symmetric (002) and asymmetric (102) rocking curves and (b) AFM image of the AlN nucleation layer on Si substrates.
